# Supplementary material for: Early Post-Transplant Leptin Concentration Changes in Kidney Transplant Recipients
Source: MDPI journal article supplement (doi:10.3390/medicina57080834), 2021-08-17
Supplement: s1 [file s1]

## Supplemental

**Table S1.** The list of the studies investigating the role of serum leptin in KTR.

| Author (year)                         | Sample size/study design                        | Mean age       | Correlations                                                                                   | Findings                                                                                                                                         |
|---------------------------------------|-------------------------------------------------|----------------|------------------------------------------------------------------------------------------------|--------------------------------------------------------------------------------------------------------------------------------------------------|
| Muras-Szwedziak et al. (2019) [1]     | 25/ follow up 3mo<br>KTR vs CKD                 | 46.9 ± 11.8    | Positive with CRP                                                                              | The impact of physical activity on adipokines                                                                                                    |
| Marchelek-Mysliwiec et al. (2019) [2] | 56/ cross-sectional<br>KTR vs HD vs control     | 55.0 ± 12.4    | Positive with BMI, BF, KT is associated with the increase of leptin, FGF23 and Klotho proteins |                                                                                                                                                  |
| Dedinská et al. (2018) [3]            | 70/ follow up 6mo                               | 46.7 ± 11.1    | Positive with TG, PTDM, AR                                                                     | Leptin is associated with PTDM and AR                                                                                                            |
| Małgorzewicz et al. (2016) [4]        | 183/cross-sectional                             | 51.7 ± 13.6    | Positive with BMI and BF %; negative with LBM, eGFR                                            | Leptin correlated with BMI and BF%, LBM and eGFR                                                                                                 |
| Fonseca et al. (2015) [5]             | 40/follow up 7 days                             | ND             | Positive with BMI, gender, age, DGF                                                            | Graft function was a strong determinant of leptinemia                                                                                            |
| Małgorzewicz et al. (2014) [6]        | 80/cross-sectional                              | 52.4 ± 14.0    | Positive with duration of KTX, BMI and BF%; negative with SGA                                  | Increased BMI, abdominal obesity, and high leptin concentration are aggravated by time after transplantation and deterioration of graft function |
| Shu et al. (2014) [7]                 | 280/cross-sectional                             | 43.5 ± 12.7    | Positive with MS, gender, BM, WC, BMI, hypertension, Cr, glucose, HbA1c, TG, uric acid         | KT recipients with MS were associated with significantly higher serum leptin levels                                                              |
| Rafieian-Kopaei et al. (2013) [8]     | 72/cross-sectional                              | 44 ± 12        | Positive with gender; negative with duration of KTX                                            | An inverse association between serum leptin and duration of renal transplantation                                                                |
| Nicoletto et al. (2012) [9]           | 32/ follow up 5 years                           | 41.5 ± 11.4    | Positive with BMI, gender, BF%, HOMA                                                           | Leptin levels and HOMA decrease in the immediate post-transplant period and remain reduced for at least 1 year                                   |
| Teplan et al. (2012) [10]             | 70/follow up 12mo                               | ND             | Positive with BF                                                                               | An increase of body fat was associated with leptin                                                                                               |
| Lee et al. (2010) [11]                | 55/cross-sectional                              | 40 to 61 years | Positive with WC, BMI, BF, TG, hs-CRP), TSF, midAFA                                            | Serum leptin concentration correlates positively with MS in KT recipients                                                                        |
| Molnar et al. (2010) [12]             | 993/cross-sectional                             | 51 ± 13        | Positive with age, MIS; negative with eGFR                                                     | MIS correlated significantly with all measures of nutritional status                                                                             |
| Kovesdy et al. (2010) [13]            | 979/cross-sectional                             | 50.9 ± 12.8    | Positive with PTH; negative with vitD                                                          | Higher leptin levels were associated with higher PTH and lower vitamin D levels                                                                  |
| Souza et al. (2007) [14]              | 32/ follow up 12mo<br>KTR vs control            | 41.5 ± 11.4    | Positive with BF, HOMA                                                                         | Pretransplant leptin levels reduced after KT                                                                                                     |
| Agras et al. (2005) [15]              | 41/cross-sectional                              | 16 to 55 years | Positive with BMI, BMD                                                                         | Elevated leptin levels are associated with increased BMD in KT recipients                                                                        |
| Malyszko et al. (2005) [16]           | 27/cross-sectional                              | 30 to 67 years | Positive with BF%, trunk fat, LBM, Cr, urea                                                    | Leptin levels are associated with graft function and BF                                                                                          |
| El Haggan et al. (2004) [17]          | 41/follow up 6mo                                | 43.7 ± 10.4    | Positive with BF, BMI, CRP                                                                     | Pretransplant leptin levels reduced KT                                                                                                           |
| Kayacan et al. (2003) [18]            | 34/ follow up 6mo<br>KTR vs control             | 29 ± 9         | Positive with BF%, HOMA                                                                        | HOMA and BF% were found to be associated with leptin level                                                                                       |
| Kagan et al. (2002) [19]              | 25/cross-sectional<br>KTR vs HTR vs LTR         | 46.0 ± 2.6     | Positive with BMI, gender, Cr, CrCl                                                            | Leptin shows correlation with gender, BMI, kidney function, insulin and cortisol levels                                                          |
| Baczowska et al. (2000) [20]          | 28/follow up 12mo<br>KTR vs control             | 39.2 ± 10.6    | Positive with BMI                                                                              | Body weight and BMI was associated with increased leptin level                                                                                   |
| Kokot et al. (1998) [21]              | 40/ follow up until discharge from the hospital | 34.3 ± 1.6     | Positive with BMI; negative with age                                                           | Leptin levels reduced after KT                                                                                                                   |

| Howard et al. (1997) [22]                                                                                                                                                                                                                                                                                                                                                                                                                                                                                                                                                                                                                                                                                                                                                                                                               | 45/ cross-sectional<br>KTR vs HD vs PD vs control | 25 to 70 years | Positive with BMI,<br>gender | Hyperleptinemia contributes to the<br>anorexia and poor nutritional<br>status in ESRD |
|-----------------------------------------------------------------------------------------------------------------------------------------------------------------------------------------------------------------------------------------------------------------------------------------------------------------------------------------------------------------------------------------------------------------------------------------------------------------------------------------------------------------------------------------------------------------------------------------------------------------------------------------------------------------------------------------------------------------------------------------------------------------------------------------------------------------------------------------|---------------------------------------------------|----------------|------------------------------|---------------------------------------------------------------------------------------|
| CRP – C reactive protein; BMI – body mass index; BF – body fat, FGF23 – fibroblast growth factor 23; KT – kidney transplantation; KTR – kidney transplant recipient; HTR – heart transplant recipient; LTR – liver transplant recipient; HD – hemodialysis; PD – peritoneal dialysis; K – healthy controls; CKD – chronic kidney disease; SGA – Subjective Global Assessment; TG – triglycerides; PTDM – post-transplant diabetes mellitus; AR – acute rejection; HOMA – homeostasis model assessment; MS – metabolic syndrome; BM – body mass; WC – waist circumference; Cr – serum creatinine; CrCl – creatinine clearance; TSF – triceps skinfold, AFA – arm fat area; MIS – malnutrition inflammation score; PTH – parathyroid hormone, vitD – vitamin D; BMD – body mineral density, ESRD – end-stage renal disease; ND – no data. |                                                   |                |                              |                                                                                       |

**Table S2.** Correlation between various variables and leptin levels.

|                        | Pre-transplant leptin concentration |         | Post-transplant (after 6 months) leptin concentration |         |
|------------------------|-------------------------------------|---------|-------------------------------------------------------|---------|
|                        | r                                   | p-value | r                                                     | p-value |
| Weight, kg             | 0.252                               | 0.042   | 0.305                                                 | 0.013   |
| BMI, kg/m <sup>2</sup> | 0.564                               | <.001   | 0.601                                                 | <.001   |
| WC, cm                 | 0.357                               | 0.003   | 0.462                                                 | 0.001   |
| Body fat, %            | 0.643                               | <.001   | 0.757                                                 | <.001   |
| Fat mass, kg           | 0.614                               | <.001   | 0.703                                                 | <.001   |
| Muscle mass, kg        | -0.194                              | 0.119   | -0.197                                                | 0.114   |
| Albumin, g/L           | -0.218                              | 0.080   | -0.148                                                | 0.238   |
| PTH, pmol/l            | 0.316                               | 0.010   | 0.278                                                 | 0.024   |
| GNRI                   | 0.407                               | 0.008   | 0.551                                                 | <.001   |
| MIS                    | -0.257                              | 0.038   | -0.150                                                | 0.232   |
| HGS, kg                | -0.312                              | 0.011   | -0.212                                                | 0.089   |

BMI – body mass index, WC – waist circumference, GNRI – geriatric nutritional risk index, MIS – malnutrition inflammation score, HGS – handgrip strength.

## References

1. Muras-Szwedziak, K.; Masajtis-Zagajewska, A.; Pawłowicz, E.; Nowicki, M. Effects of a Structured Physical Activity Program on Serum Adipokines and Markers of Inflammation and Volume Overload in Kidney Transplant Recipients. *Ann. Transplant.* **2019**, *24*, 569–575, doi:10.12659/aot.917047.
2. Marchelek-Mysłiwiec, M.; Dziedzicko, V.; Nowosiad-Magda, M.; Wiśniewska, M.; Safranow, K.; Pawlik, A.; Domański, L.; Dołęgowska, K.; Stępniewska, J.; Ciechanowski, K. Bone Metabolism Parameters in Hemodialysis Patients with Chronic Kidney Disease and in Patients after Kidney Transplantation. *Physiol. Res.* **2019**, *68*, 947–954, doi:10.33549/physiolres.934118.
3. Dedinská, I.; Mäčková, N.; Kantárová, D.; Kováčiková, L.; Graňák, K.; Ľudovít, L.; Miklušica, J.; Skálová, P.; Galajda, P.; Mokáň, M. Leptin—A new marker for development of post-transplant diabetes mellitus? *J. Diabetes Complicat.* **2018**, *32*, 863–869, doi:10.1016/j.jdiacomp.2018.07.002.
4. Małgorzewicz, S.; Dębska-Słizień, A.; Czajka, B.; Owczarzak, A.; Rutkowski, B. Influence of Body Mass on Kidney Graft Function in Patients After Kidney Transplantation. *Transplant. Proc.* **2016**, *48*, 1472–1476, doi:10.1016/j.transproceed.2015.12.137.
5. Fonseca I, Oliveira JC, Santos J, Malheiro J, Martins LS, Almeida M, et al. Leptin and adiponectin during the first week after kidney transplantation: Biomarkers of graft dysfunction? *Metabolism.* **2015**;64(2):202–7.
6. Małgorzewicz, S.; Dębska-Słizień, A.; Czajka, B.; Rutkowski, B. Adipokines and Nutritional Status in Kidney Transplant Recipients. *Transplant. Proc.* **2014**, *46*, 2622–2626, doi:10.1016/j.transproceed.2014.09.014.
7. Shu, K.-H.; Wu, M.-J.; Chen, C.-H.; Cheng, C.-H.; Yu, T.-M.; Chuang, Y.-W.; Huang, S.-T.; Tsai, S.-F.; Lo, Y.-C.; Weng, S.-C.; et al. Serum Adipokine Levels in Renal Transplant Recipients. *Transplant. Proc.* **2014**, *46*, 381–384, doi:10.1016/j.transproceed.2013.11.033.
8. Rafieian-Kopaei M, Nasri H. Serum leptin in renal transplant patients. *J Ren Inj Prev.* **2013**;2(2):55–557.
9. Nicoletto, B.B.; Souza, G.C.; Gonçalves, L.F.; Costa, C.; Perry, I.S.; Manfro, R.C. Leptin, Insulin Resistance, and Metabolic Changes 5 Years After Renal Transplantation. *J. Ren. Nutr.* **2012**, *22*, 440–449, doi:10.1053/j.jrn.2011.09.003.
10. Teplan, V.; Malý, J.; Gürlich, R.; Kudla, M.; Pit'Ha, J.; Racek, J.; Haluzik, M.; Šenolt, L.; Stollova, M. Muscle and Fat Metabolism in Obesity After Kidney Transplantation: No Effect of Peritoneal Dialysis or Hemodialysis. *J. Ren. Nutr.* **2012**, *22*, 166–170, doi:10.1053/j.jrn.2011.10.016.
11. Lee, M.-C.; Lee, C.-J.; Ho, G.-J.; Lee, C.-C.; Shih, M.-H.; Chou, K.-C.; Hsu, B.-G. Hyperleptinemia positively correlated with metabolic syndrome in renal transplant recipients. *Clin. Transplant.* **2010**, *24*, E124–E129, doi:10.1111/j.1399-0012.2010.01215.x.
12. Molnar, M.Z.; Keszei, A.; Czira, M.E.; Rudas, A.; Ujszaszi, A.; Haromszeki, B.; Kosa, J.P.; Lakatos, P.; Sárváry, E.; Beko, G.; et al. Evaluation of the Malnutrition-Inflammation Score in Kidney Transplant Recipients. *Am. J. Kidney Dis.* **2010**, *56*, 102–111, doi:10.1053/j.ajkd.2010.02.350.

13. Kovesdy, C.P.; Molnar, M.Z.; Czira, M.E.; Rudas, A.; Ujszaszi, A.; Rosivall, L.; Szathmari, M.; Covic, A.; Keszei, A.; Beko, G.; et al. Associations between Serum Leptin Level and Bone Turnover in Kidney Transplant Recipients. *Clin. J. Am. Soc. Nephrol.* **2010**, *5*, 2297–2304, doi:10.2215/CJN.03520410.
14. Souza, G.; Costa, C.; Gonçalves, L.; Manfro, R. Leptin Serum Levels in the First Year Post-Renal Transplantation. *Transplant. Proc.* **2007**, *39*, 439–440, doi:10.1016/j.transproceed.2007.01.040.
15. Agras, P.; Baskin, E.; Saatci, U.; Colak, T.; Cengiz, N.; Kinik, S.; Isiklar, I.; Haberal, A.; Mert, I.; Haberal, M.; et al. Relationship Between Leptin and Bone Mineral Density in Renal Transplant Recipients. *Transplant. Proc.* **2005**, *37*, 3106–3108, doi:10.1016/j.transproceed.2005.08.027.
16. Malyszko, J.; Pawlak, K.; Konstantynowicz, J.; Wolczynski, S.; Kaczmarek, M.; Mysliwiec, M. Correlations Between Leptin, Body Composition, Bone Mineral Density, and Bone Metabolism in Kidney Transplant Recipients. *Transplant. Proc.* **2005**, *37*, 2151–2153, doi:10.1016/j.transproceed.2005.03.001.
17. El Haggan, W.; Chauveau, P.; Barthe, N.; Merville, P.; Potaux, L.; Aparicio, M. Serum leptin, body fat, and nutritional markers during the six months post-kidney transplantation. *J. Metab.* **2004**, *53*, 614–619, doi:10.1016/j.metabol.2003.10.034.
18. Kayacan, S.M.; Yildiz, A.; Kazancioğlu, R.T.; Sahin, S.; Sever, M.S.; Ark, E. The changes in serum leptin, body fat mass and insulin resistance after renal transplantation. *Clin. Transplant.* **2003**, *17*, 63–68, doi:10.1034/j.1399-0012.2003.02078.x.
19. Kagan, A.; Haran, N.; Leschinsky, L.; Sarafian, R.; Aravot, D.; Dolberg, J.; Ben-Ary, Z.; Rapoport, J. Serum Concentrations of Leptin in Heart, Liver and Kidney Transplant Recipients. *Isr. Med. Assoc. J.* **2002**, *4*, 213–217.
20. Baćzkowska, T.; Soin, J.; Soluch, L.; Lao, M.; Gaciong, Z. The role of leptin in body mass index increase in renal allograft recipients. *Transplant. Proc.* **2000**, *32*, 1331–1332.
21. Kokot, F.; Adamczak, M.; Wiecek, A. Plasma leptin concentration in kidney transplant patients during early post-transplant period. *Nephrol. Dial. Transplant.* **1998**, *13*, 2276–2280, doi:10.1093/ndt/13.9.2276.
22. Howard, J.K.; Lord, G.; Clutterbuck, E.J.; Ghatei, M.A.; Pusey, C.D.; Bloom, S.R. Plasma Immunoreactive Leptin Concentration in End-Stage Renal Disease. *Clin. Sci.* **1997**, *93*, 119–126, doi:10.1042/cs0930119.
